# Supplementary material for: Teaching and Learning during the COVID-19 Pandemic: A Topic Modeling Study
Source: MDPI journal article supplement (doi:10.3390/educsci11070347), 2021-07-13
Supplement: s1 [file s1]

Archive with 1 entries (1 files):
- education-1293399-supplementary.pdf
