# Supplementary material for: Teaching and Learning during the COVID-19 Pandemic: A Topic Modeling Study
Source: MDPI journal article supplement (doi:10.3390/educsci11070347), 2021-07-13
Supplement: s1 [file s1 › education-1293399-supplementary.pdf]

# **Teaching and Learning during the COVID-19 Pandemic: A Topic Modeling Study**

Ranjit Vijayan<sup>1,\*</sup>

<sup>1</sup>Department of Biology, College of Science, United Arab Emirates University, Al Ain, United Arab Emirates. Phone: +971 3 713 6302

\*Correspondence: [ranjit.v@uaeu.ac.ae](mailto:ranjit.v@uaeu.ac.ae)

## **SUPPLEMENTARY MATERIALS**

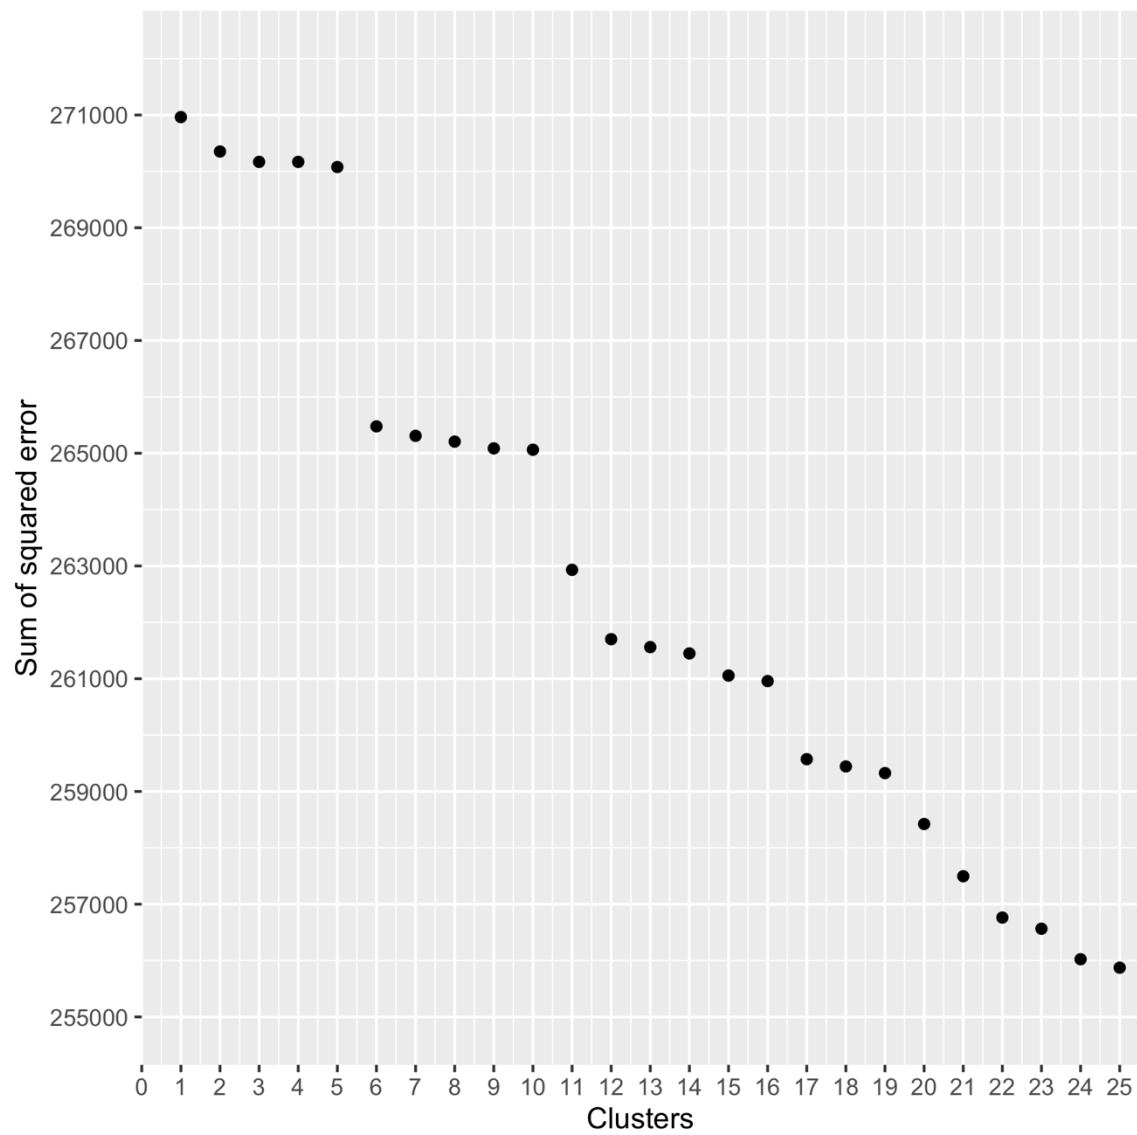

**Figure S1.** Plot of number of clusters versus sum of squared errors obtained from principal component analysis of terms identified from abstracts of articles obtained from the search “teaching COVID-19”.

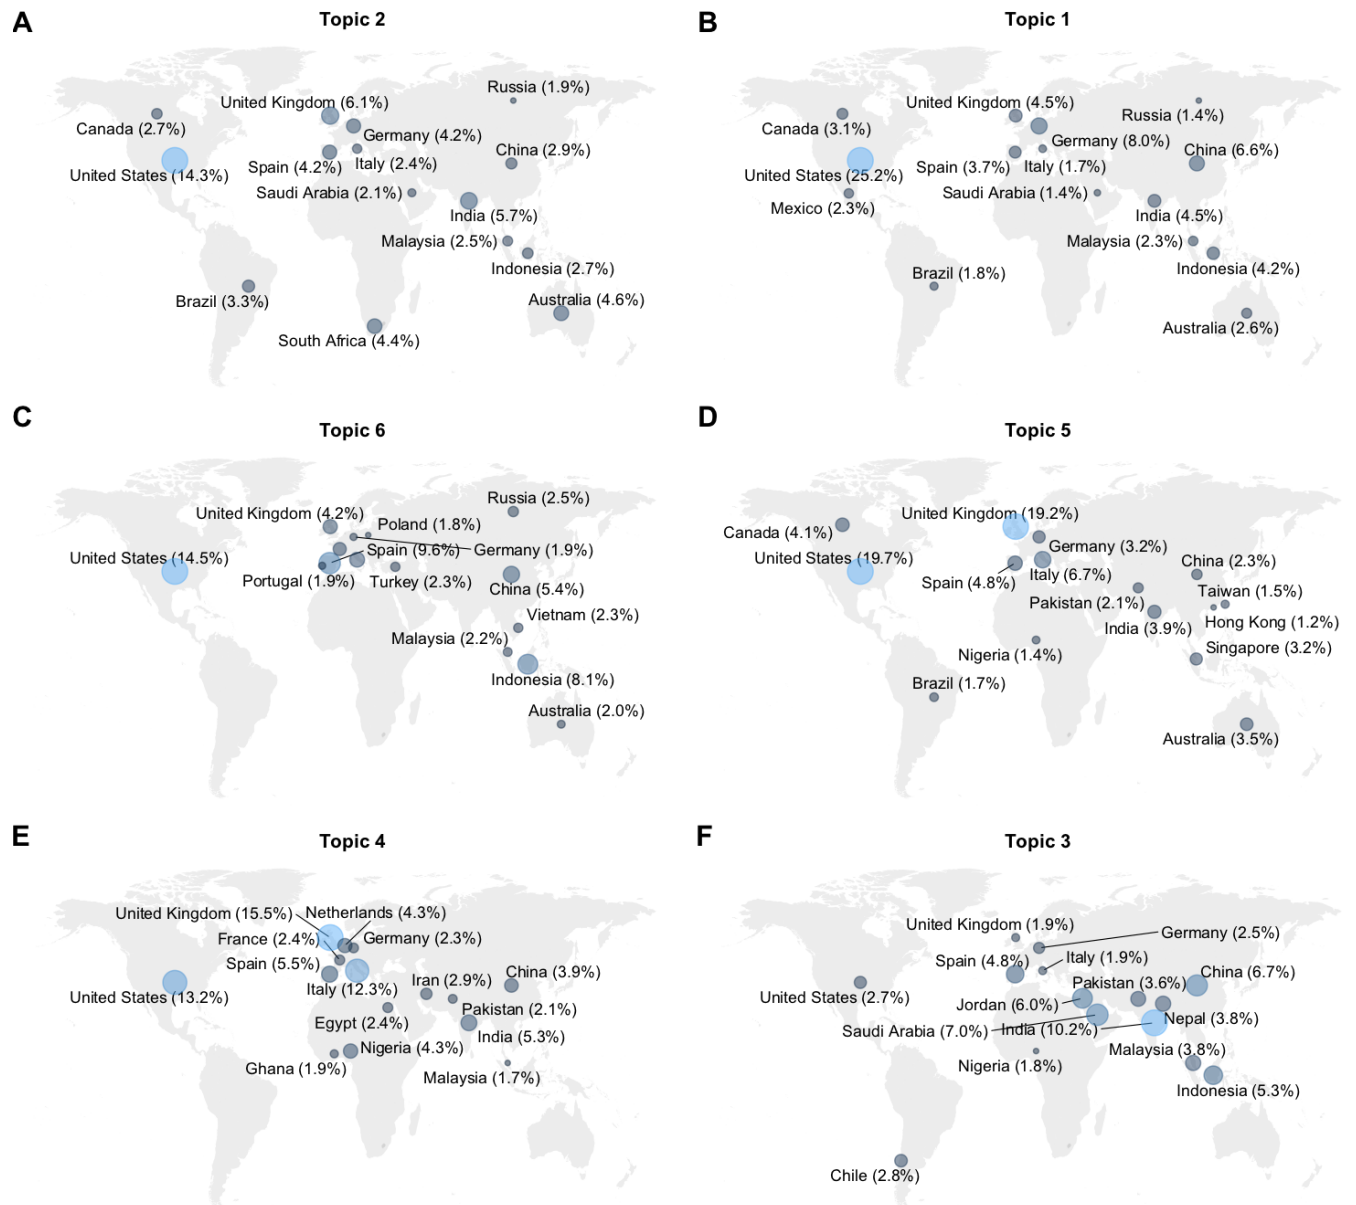

**Figure S2.** Distribution of the countries of authors of articles in each of the identified topics. Topics are sorted based on the total number of articles in each topic as shown in Figure 3A. (A) Topic 2; (B) Topic 1; (C) Topic 6; (D) Topic 5; (E) Topic 4; and (F) Topic 3.
